# Supplementary material
Source: PubMed Central journal article supplement (PMC5155635)
Supplement: NIHMS821725-supplement.pdf [file NIHMS821725-supplement.pdf]

**A**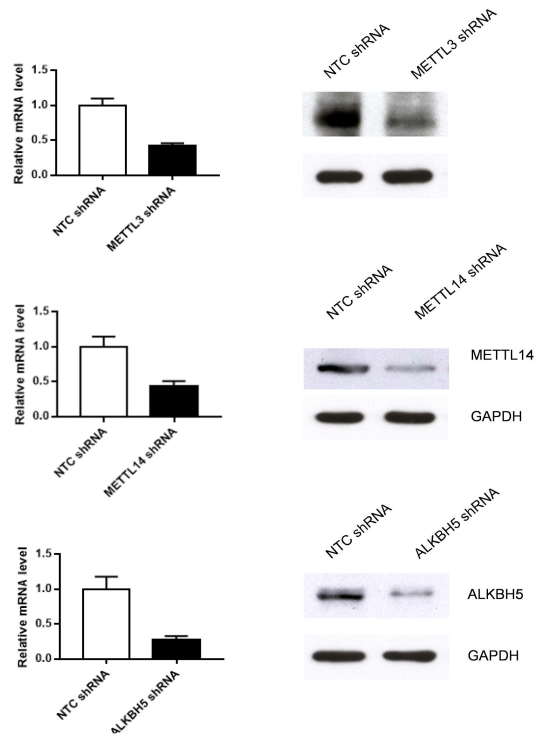**B**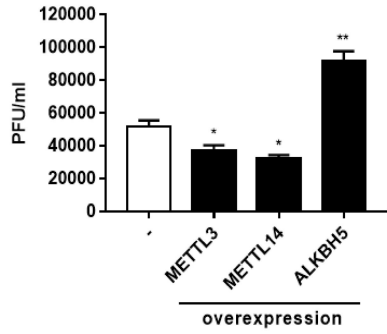**C**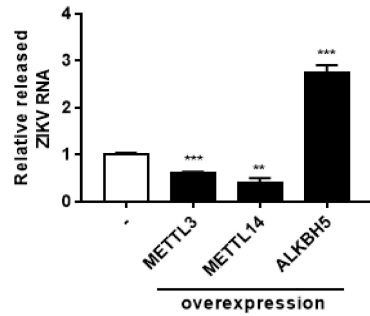**D**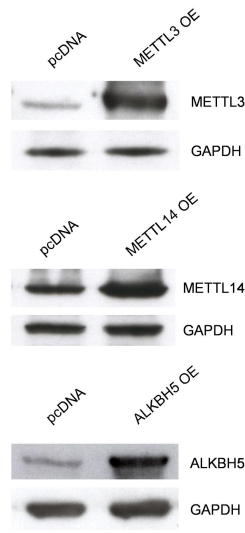**E**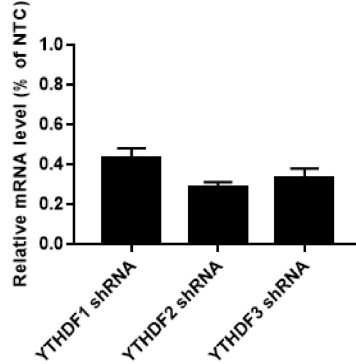**F**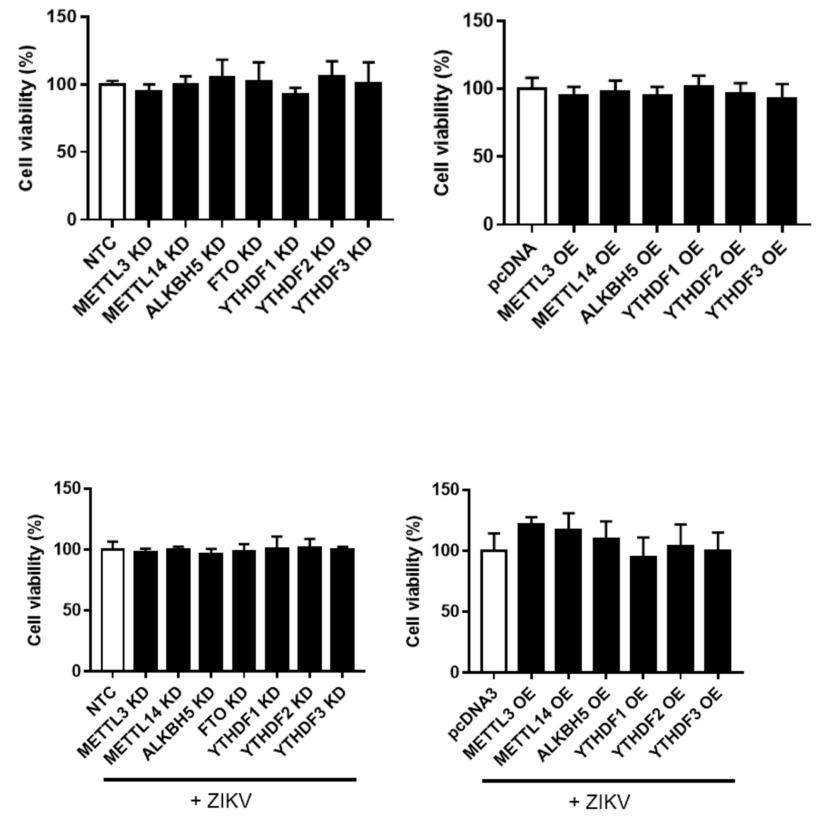**G**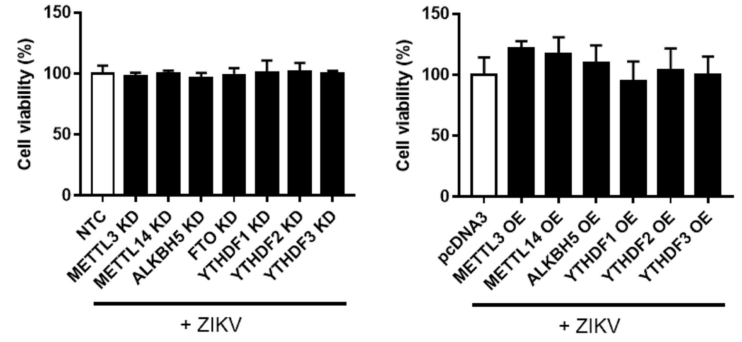

**A**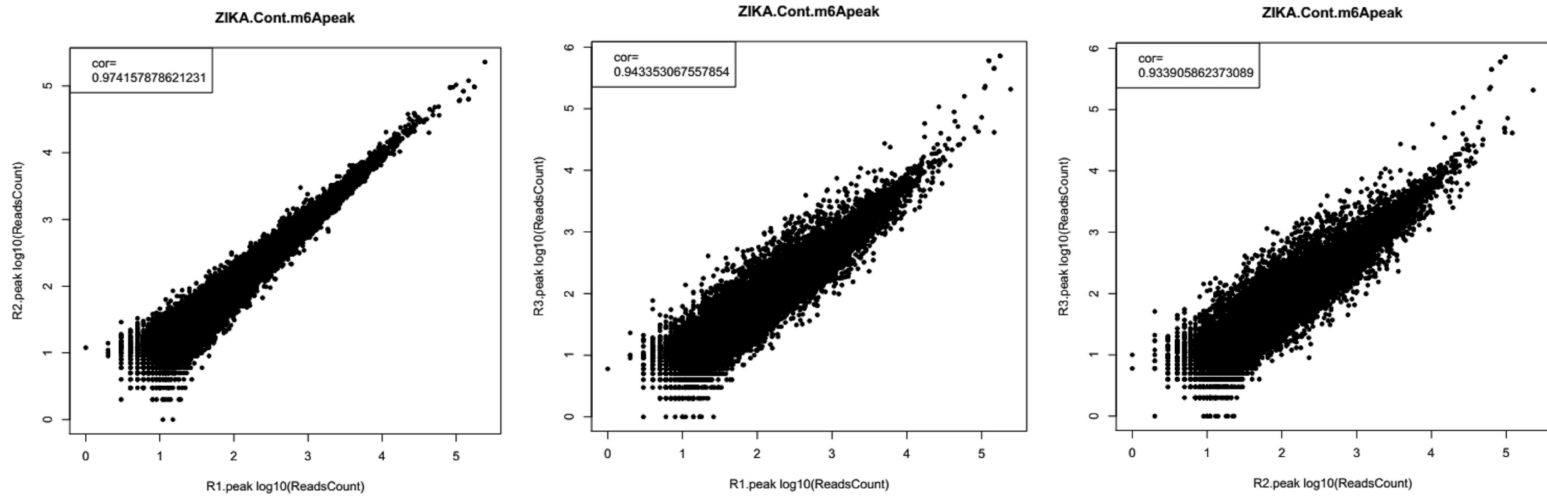**B**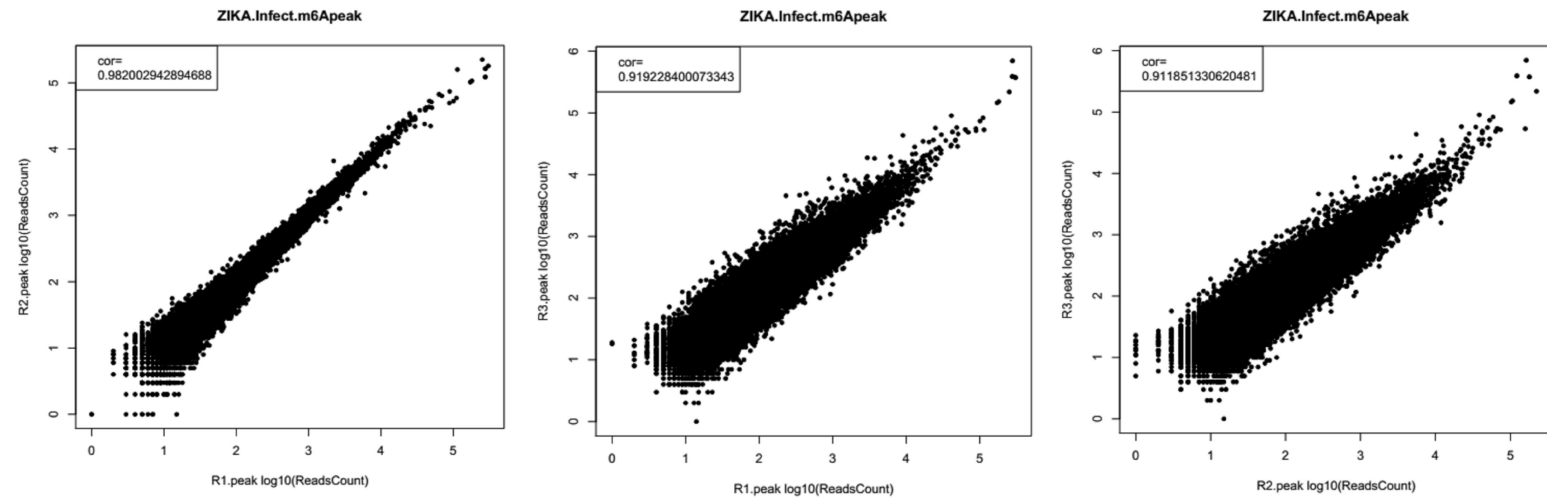**C**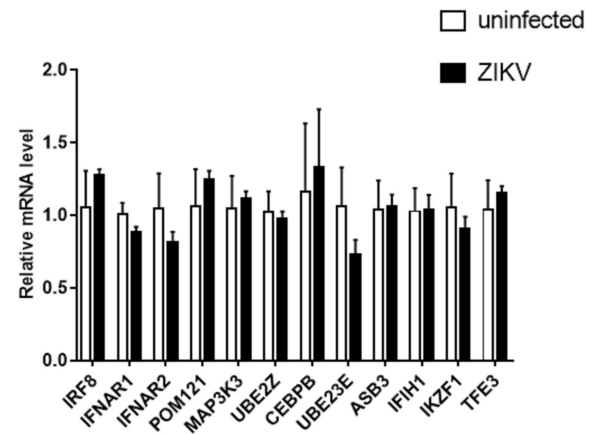

**Figure S1.** Related to Figure 1

(A) Correlation test between two biological replicates of vgRNA is shown.

(B) Alignment and m<sup>6</sup>A motif identity/conservation is shown for the 12 m<sup>6</sup>A peaks identified in ZIKV RNA among five ZIKV strains (MR766, Paraiba, KX156774, KU501215 and FSS13025). The DRACH, MGACK, and UGAC consensus motifs are highlighted in yellow.

(C) Nuclear and cytoplasmic localization of METTL3, METTL14 and ALKBH5 visualized by immunostaining of uninfected (Mock) and ZIKV-infected 293T cells at 24 h after infection. Cells were counterstained with DAPI. Scale bar, 100 μm. Arrows indicate cells with evident cytoplasmic localization of the indicated protein.

**Figure S2.** Related to Figure 2

(A) Silencing efficiency of shRNAs. METTL3, METTL14, and ALKBH5 expression in 293T cells expressing non-targeting shRNA (NTC) or the indicated gene-specific shRNAs, analyzed by qRT-PCR (left) or western blotting (right). N = 3.

(B, C) Viral titers (particle production) (B) and ZIKV RNA levels in supernatants (C) of 293T cells overexpressing METTL3, METTL14, or ALKBH5 proteins. N = 3.

(D) Western blot analysis of METTL3, METTL14, and ALKBH5 proteins in 293T cells expressing control pcDNA or the indicated overexpression vectors. GAPDH was probed as a loading control. All data are the mean ± SEM of the indicated number of replicates. Student's t-test \* p < 0.05, \*\* p < 0.005, \*\*\* p < 0.0005.

(E) Silencing efficiency of YTHDF1, 2, and 3 expression in 293T cells expressing indicated gene-specific shRNAs or non-targeting shRNA control (NTC) analyzed by qRT-PCR.

(F, G) Cell viability analyses by MTS assays in uninfected (F) and ZIKV infected (G) for specific shRNA knockdown (KD) or overexpression (OE) experiments as indicated.

**Figure S3.** Related to Figure 3

(A,B) Paired correlation analysis of the three biological replicates of (A) uninfected (control R1, R2, R3) and (B) ZIKV-infected samples (infect R1, R2, R3). Each paired results exhibit high correlation values, indicating good replicability.

(C) Relative mRNA level of genes listed in Suppl. Table 1 in mock or ZIKV-infected cells quantified by qRT-PCR.

**Table S1, related to Fig 3 | Immune-Related Genes with Newly Gained or Lost m<sup>6</sup>A Peaks in ZIKV-Infected Cells**

| <b>ZIKV-enriched m<sup>6</sup>A genes - Immunity related</b> |                              |
|--------------------------------------------------------------|------------------------------|
| <b>Gene</b>                                                  | <b>New m6A peak location</b> |
| CREBBP                                                       | CDS                          |
| NCAM1                                                        | CDS                          |
| CLTC                                                         | CDS                          |
| KPNA2                                                        | CDS                          |
| IRF2                                                         | CDS                          |
| PML                                                          | CDS                          |
| IRF8                                                         | 3'_UTR_junction              |
| IFNAR2                                                       | 3'_UTR                       |
| IFNAR1                                                       | 3'_UTR                       |
| POM121                                                       | 3'_UTR                       |
| SH2B1                                                        | CDS                          |
| IRS1                                                         | CDS                          |
| MAP3K3                                                       | 3'_UTR                       |
| KIF3C                                                        | CDS                          |
| HUWE1                                                        | CDS                          |
| UBE2E3                                                       | 5'_UTR_junction              |
| UBE2Z                                                        | 3'_UTR                       |
| TRIM9                                                        | 5'_UTR                       |
| UBR2                                                         | CDS                          |
| ASB3                                                         | 5'_UTR                       |
| DZIP3                                                        | CDS                          |
| TAP2                                                         | CDS                          |
| AP1M1                                                        | CDS                          |
| DYNC1L12                                                     | CDS                          |
| RAP1GAP2                                                     | CDS                          |
| IFIH1                                                        | 5'_UTR                       |
| APP                                                          | CDS                          |
| C4A                                                          | CDS                          |
| CEBPB                                                        | 3'_UTR_junction              |
| IKZF1                                                        | 5'_UTR                       |
| TFE3                                                         | 5'_UTR_junction              |
| CACTIN                                                       | CDS                          |
| WNT5A                                                        | CDS                          |
| CSF1                                                         | CDS                          |
| ZBTB46                                                       | CDS                          |
| BMP4                                                         | CDS                          |
| PARP1                                                        | CDS                          |
| C4B                                                          | CDS                          |
| SUSD4                                                        | CDS                          |

| <b>ZIKV-depleted m<sup>6</sup>A genes - Immunity related</b> |                               |
|--------------------------------------------------------------|-------------------------------|
| <b>Gene</b>                                                  | <b>Lost m6A peak location</b> |
| TYRO3                                                        | Exon_junction                 |
| GLI2                                                         | CDS                           |
| PATZ1                                                        | CDS                           |
| HMGB2                                                        | Exon_junction                 |
| ITGB1                                                        | Exon_junction                 |
| MOV10                                                        | CDS                           |
| RFWD3                                                        | Exon_junction                 |
| LRRC8A                                                       | CDS                           |
| MYLK                                                         | Exon_junction                 |
| HMGB2                                                        | Exon_junction                 |
| GLI2                                                         | CDS                           |
| SH3D19                                                       | Exon_junction                 |
| TACC3                                                        | CDS                           |
| ACTR1A                                                       | 5'_UTR_junction               |
| SNRPB                                                        | 5'_UTR                        |
| KIF15                                                        | 5'_UTR                        |
| CD24                                                         | 5'_UTR                        |
| CD24                                                         | 5'_UTR                        |
| PAK1                                                         | 3'_UTR                        |
| MMP14                                                        | 3'_UTR                        |
| ERCC1                                                        | 3'_UTR                        |
| BRK1                                                         | 3'_UTR                        |
| ERCC1                                                        | 3'_UTR                        |
| BRK1                                                         | 3'_UTR                        |
| SP3                                                          | CDS                           |
| RPS6KB2                                                      | Exon_junction                 |
| IRS2                                                         | CDS                           |
| MAFB                                                         | CDS                           |
| ERCC2                                                        | Exon_junction                 |
| LIG4                                                         | CDS                           |
| NFKB1                                                        | Exon_junction                 |
| CHD2                                                         | CDS                           |
| KAT6A                                                        | CDS                           |
| NFKB1                                                        | Exon_junction                 |
| AGO4                                                         | Exon_junction                 |
| IRS2                                                         | CDS                           |
| ERCC2                                                        | Exon_junction                 |
| ONECUT1                                                      | 5'_UTR_junction               |
| SEC24C                                                       | 5'_UTR_junction               |

## **SUPPLEMENTAL EXPERIMENTAL PROCEDURES**

### **Lentiviral Preparation, Cell Transduction, and Viral RNA Quantification**

293T cells ( $10^6$ ) were transfected with pLKO shRNA (1  $\mu$ g), psPAX.2 (0.75  $\mu$ g), and pMD2.G (0.25  $\mu$ g) vectors using Lipofectamine 2000 and Opti-MEM (Invitrogen) according to the manufacturer's instructions. The medium was replaced with complete DMEM at 4 h post-transfection, and 48 h later, the supernatant was collected, filtered through a 0.22  $\mu$ m membrane, and incubated with 293T cells in the presence of 1  $\mu$ g/ml polybrene. After 12 h, the medium was removed and replaced with complete DMEM. At 3 days post-transduction, 293T cells were infected with MR766 virus at an MOI of 5. After 12 h, the medium was changed. Viral supernatants were collected and total cellular RNA was prepared at 48 h after infection. Viral titer was assessed as described above. Total RNA was extracted using TRIzol reagent (Invitrogen). mRNA expression was measured using iScript Reverse Transcription Supermix for RT-qPCR and iTaq Universal SYBR Green Supermix (Bio-Rad) for qPCR. Viral RNA released into the supernatant was measured using an iScript One Step RT-PCR kit.

### **Plaque-Forming Unit Assay**

Confluent Vero cells were inoculated with four serial 10-fold dilutions of supernatants from infected cells. After 2 h, the cells were washed, overlaid with plaque medium containing 0.4% agarose, and cultured at 37°C for 4 days. Cells were then fixed with 3.7% formaldehyde, stained with 0.1% crystal violet in 20% ethanol, and plaques counted.

### **METTL3, METTL14, and ALKBH5 Overexpression**

METTL3, METTL14, and ALKBH5 overexpression plasmids were constructed by cloning the corresponding cDNAs into the mammalian expression vector pcDNA3 (Invitrogen). 293T cells were transfected using Lipofectamine 2000 and Opti-MEM. The medium was replaced with complete DMEM after 4 h, and 48 h later, the cells were infected with MR766 virus at an MOI of 5. Viral supernatants were collected and total cellular RNA was prepared at 24 h post-infection. Viral titer and RNA were quantified as described above.

### **FLAG-YTHDF1-3 Overexpression and Immunoprecipitation**

293T cells ( $2 \times 10^6$ ) were transfected with 2  $\mu$ g FLAG-YTHDF or control pcDNA plasmids using Lipofectamine 2000 and Opti-MEM. After 4 h, the medium was replaced with complete DMEM, and 20 h later, the cells were infected with ZIKV at an MOI of 5. At 24 h post-infection, cells

were lysed with Pierce IP lysis buffer supplemented with protease inhibitors and RNaseOUT. An aliquot of cleared lysate (5%) was saved as input. The remaining lysate was incubated overnight at 4°C with 2 µg of anti-FLAG antibody (clone M2, Sigma) and 50 µl of Protein G Dynabeads (Invitrogen). Beads were washed three times with lysis buffer and divided in half for RNA extraction and RT-qPCR analysis or for western blot analysis.

### **Liquid Chromatography–Tandem Mass Spectrometry**

Genomic RNA from MR766 ZIKV was isolated from Vero cells as described previously (Dang et al., 2016), and modified nucleoside levels were quantified using LC-MS/MS as described (Jia et al., 2011). Briefly, 50 ng of viral genomic RNA was digested by nuclease P1 (2 U, Wako) in 25 µl of buffer containing 25 mM NaCl and 2.5 mM ZnCl<sub>2</sub> at 42°C for 2 h, and then NH<sub>4</sub>HCO<sub>3</sub> (1 M, 3 µl) and alkaline phosphatase (0.5 U, Sigma) were added and the samples were incubated at 37°C for an additional 2 h. The samples were diluted to 50 µl with nuclease-free water, filtered (0.22 µm pore size, 4 mm diameter, Millipore), and 10 µl aliquots were taken for analysis.

Nucleosides were separated on a reverse phase ultra-performance liquid chromatography C18 column with in-line mass spectrometry detection using an Agilent 6410 QQQ triple-quadrupole LC mass spectrometer in positive electrospray ionization mode. Each modified nucleoside was quantified by the ratio of modified to unmodified nucleoside levels.

### **Data Analysis**

For data analysis, after removing the adapter, the reads were mapped to human genome (hg38) and ZIKA genome (NC\_012532) by using Tophat2 (Kim et al., 2013). The peak calling method was modified from the published method (Dominissini et al., 2012). To call m<sup>6</sup>A peaks, the longest isoform of each Human RefSeq gene (and the whole genome of ZIKV) was scanned using a 100 bp sliding window with 10 bp steps. To reduce bias from potential inaccurate gene structure annotation and the arbitrary use of the longest isoform, windows with read counts less than 1/20 of the top window in both m<sup>6</sup>A immunoprecipitate and input samples were excluded. For each gene, the read count in each window was normalized by the median count of all windows of that gene. A negative binomial model was used to identify the differential windows between immunoprecipitate and input samples by using the edgeR package (Robinson et al., 2010), for each and eventually combining information from all three replicates in the two groups. The window was called as positive if the FDR was <1% and the log<sub>2</sub>(enrichment score) was ≥1. Overlapping positive windows were merged. The following were calculated to obtain the enrichment score of each peak (or window): (a) read counts of the immunoprecipitated sample

in the current peak/window, (b) median read counts of the immunoprecipitated sample in all 100 bp windows on the current mRNA, (c) read counts of the input sample in the current peak/window, and (d) median read counts of the input sample in all 100 bp windows on the current mRNA. The enrichment score of each window was calculated as  $([a \times d])/([b \times c])$ .

### Primer List

| Primer      | Sequence                |
|-------------|-------------------------|
| GAPDH Fwd   | TGGCGGGGAAGTCAG         |
| GAPDH Rev   | CGGAGGAGAAATCGGGC       |
| ZIKV Fwd    | TTGGTCATGATACTGCTGATTGC |
| ZIKV Rev    | CCCTCCACGAAGTCTCTATTGC  |
| METTL3 Fwd  | GACACGTGGAGCTCTATCCA    |
| METTL3 Rev  | GGAAGGTTGGAGACAATGCT    |
| METTL14 Fwd | TCCCAAATCTAAATCTGACCG   |
| METTL14 Rev | CTCTAAAGCCACCTCTTTCTC   |
| ALKBH5 Fwd  | AGGGACCCTGCTCTGAAAC     |
| ALKBH5 Rev  | TCCTTGTCATCTCCAGGAT     |



## shRNA Sequences

| shRNA     | Sequence                                                       |
|-----------|----------------------------------------------------------------|
| NTC       | CCGCAGGTATGCACGCGT                                             |
| METTL3-1  | CCGGGCAAGTATGTTCACTATGAAACTCGAGTTTCATAGTGAACA<br>TACTTGCTTTTTG |
| METTL3-2  | CCGGGCCAAGGAACAATCCATTGTTCTCGAGAACAATGGATTGT<br>TCCTTGGCTTTTTG |
| METTL14-1 | CCGGCCATGTACTIONACAAGCCGATACTCGAGTATCGGCTTGTA<br>GTACATGGTTTT  |
| METTL14-2 | CCGGGCCGTGGACGAGAAAGAAATACTCGAGTATTTCTTTCTCG<br>TCCACGGCTTTTT  |
| ALKBH5-1  | CCGGGAAAGGCTGTTGGCATCAATACTCGAGTATTGATGCCAAC<br>AGCCTTTCTTTTTG |
| ALKBH5-2  | CCGGCCACCCAGCTATGCTTCAGATCTCGAGATCTGAAGCATAG<br>CTGGGTGGTTTTTG |
| FTO-1     | CCGGCGGTTCAACCTCGGTTTAGCTCGAGCTAAACCGAGGTT<br>GTGAACCGTTTTTG   |
| FTO-2     | CCGGTCACCAAGGAGACTGCTATTTCTCGAGAAATAGCAGTCTC<br>CTTGGTGATTTTTG |
| YTHDF1-1  | CCGGCCCTACCTGTCCAGCTATTACCTCGAGGTAATAGCTGGAC<br>AGGTAGGGTTTTTG |
| YTHDF1-2  | CCGGCCCGAAAGAGTTTGAGTGGAACCTCGAGTTCCACTCAA<br>CTTTCCGGGTTTTTG  |
| YTHDF2-1  | CCGGGCTACTCTGAGGACGATATTCCTCGAGGAATATCGTCCTC<br>AGAGTAGCTTTTTG |
| YTHDF2-2  | CCGGCGGTCCATTAATAACTATAACCTCGAGGTTATAGTTATTAA<br>TGGACCGTTTTTG |
| YTHDF3-1  | CCGGTAAGTCAAAGAAGACGTATTACTCGAGTAATACGTCTTCTT<br>TGACTTATTTTTG |
| YTHDF3-2  | CCGGGAAGTCTGTTGTGGACTATAACTCGAGTTATAGTCCACAA<br>CAGACTTCTTTTTG |

## SUPPLEMENTAL REFERENCES

Dang, J., Tiwari, S.K., Lichinchi, G., Qin, Y., Patil, V.S., Eroshkin, A.M., and Rana, T.M. (2016). Zika Virus Depletes Neural Progenitors in Human Cerebral Organoids through Activation of the Innate Immune Receptor TLR3. *Cell Stem Cell* 19, 258-265.

Dominissini, D., Moshitch-Moshkovitz, S., Schwartz, S., Salmon-Divon, M., Ungar, L., Osenberg, S., Cesarkas, K., Jacob-Hirsch, J., Amariglio, N., Kupiec, M., *et al.* (2012). Topology of the human and mouse m6A RNA methylomes revealed by m6A-seq. *Nature* 485, 201-206.

Jia, G., Fu, Y., Zhao, X., Dai, Q., Zheng, G., Yang, Y., Yi, C., Lindahl, T., Pan, T., Yang, Y.G., *et al.* (2011). N6-methyladenosine in nuclear RNA is a major substrate of the obesity-associated FTO. *Nature chemical biology* 7, 885-887.

Kim, D., Pertea, G., Trapnell, C., Pimentel, H., Kelley, R., and Salzberg, S.L. (2013). TopHat2: accurate alignment of transcriptomes in the presence of insertions, deletions and gene fusions. *Genome Biol* 14, R36.

Robinson, M.D., McCarthy, D.J., and Smyth, G.K. (2010). edgeR: a Bioconductor package for differential expression analysis of digital gene expression data. *Bioinformatics* 26, 139-140.
